# Supplementary material
Source: PubMed Central journal article supplement (PMC2597381)

**SUPPORTING INFORMATION****Biomimetic and Aggregation-Driven Crystallization Route for Room-Temperature Material Synthesis: Growth of  $\beta$ -Ga<sub>2</sub>O<sub>3</sub> Nanoparticles Using Peptide Assemblies as Nanoreactors**

Authors: Sang-Yup Lee, Xueyun Gao, and Hiroshi Matsui\*

Author Affiliation:

Department of Chemistry, Hunter College and The Graduate Center, The City University of New York, 695 Park Ave, New York, NY, 10021.

S-1. The size distribution of  $\beta$ -Ga<sub>2</sub>O<sub>3</sub> nanoparticles. *The diameters of one hundred Ga<sub>2</sub>O<sub>3</sub> nanoparticles were measured in TEM images and their size distribution is shown below.*

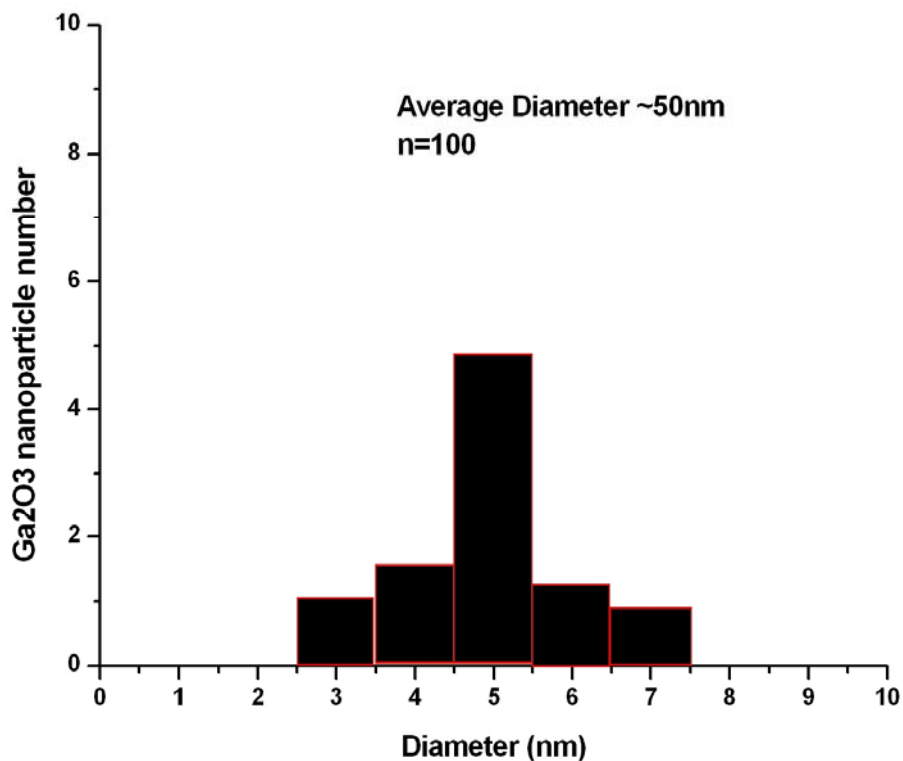

S-2 AFM image of  $\beta$ -Ga<sub>2</sub>O<sub>3</sub> nanoparticles. *Height profile of the  $\beta$ -Ga<sub>2</sub>O<sub>3</sub> nanoparticle was shown in AFM image.*

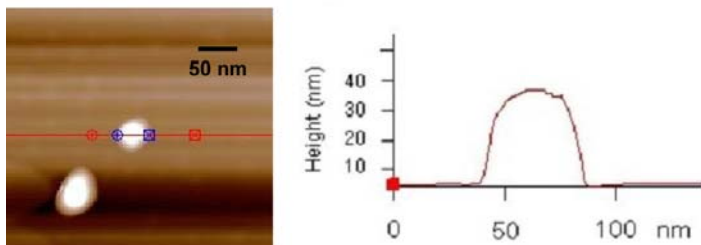

S-3 PL spectrum of  $\beta$ -Ga<sub>2</sub>O<sub>3</sub>. *This  $\beta$ -Ga<sub>2</sub>O<sub>3</sub> nanoparticle had an emission at 389 nm, matching with photoluminescent (PL) of  $\beta$ -Ga<sub>2</sub>O<sub>3</sub> nanowires.*

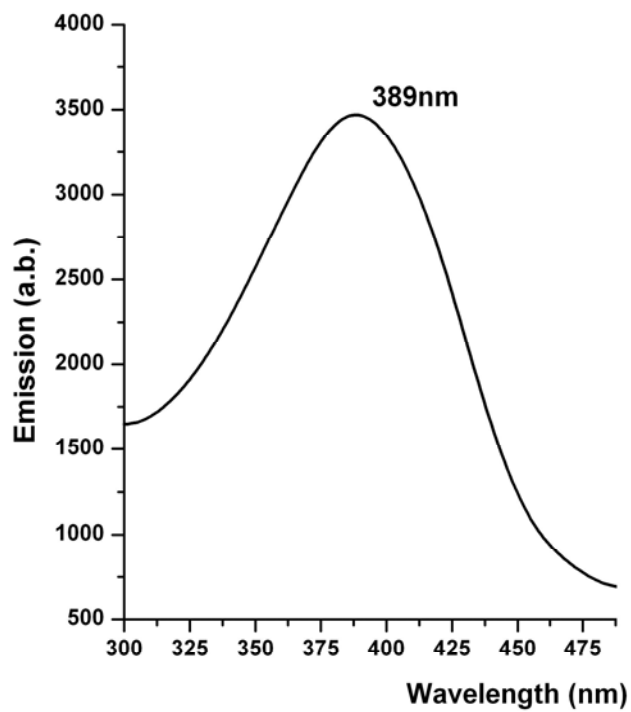

Supplement: NIHMS62053-supplement-si20070109_051.pdf [file NIHMS62053-supplement-si20070109_051.pdf]
